# Supplementary material
Source: PubMed Central journal article supplement (PMC7018597)
Supplement: NIHMS1537773-supplement-2.pdf [file NIHMS1537773-supplement-2.pdf]

Table 1. Description of Reviewed Studies

| Authors, Year                  | Study Purpose                                                                                                | Country          | Study Design                                                                | Methods                                                                                                       | Participants                                                                                   | Summary of Findings                                                                                                                                                                                                                                                                                                                                                                                                                                                                      |
|--------------------------------|--------------------------------------------------------------------------------------------------------------|------------------|-----------------------------------------------------------------------------|---------------------------------------------------------------------------------------------------------------|------------------------------------------------------------------------------------------------|------------------------------------------------------------------------------------------------------------------------------------------------------------------------------------------------------------------------------------------------------------------------------------------------------------------------------------------------------------------------------------------------------------------------------------------------------------------------------------------|
| 1. Ebert et al., 2014          | To understand the factors that impact participation in decision-making by socially disadvantaged women       | Australia        | Interpretive phenomenological                                               | 3 segregated focus groups<br>Iterative analysis with elicited validation from participants                    | 17 women of socially disadvantaged background and having given birth within 24 months          | Women wanted to be involved in decision-making but felt that they did not belong and instead delegated decision-making to midwives.<br>Three factors improved participation: (1) Feeling Safe, (2) Feeling Valued, (3) Being Available                                                                                                                                                                                                                                                   |
| 2. Armstrong & Kenyon, 2017    | To explore women's experiences of decision-making about augmentation with labor dystocia                     | United Kingdom   | Constant comparative method contextualized in Annemarie Mol "Logic of Care" | Semi-structured interviews<br>Thematic analysis                                                               | 18 low-risk nulliparous women 2 weeks postpartum who received Pitocin for labor augmentation   | Women went through a phase of acceptance as labor progressed slowly and choice receded. In coping, most women ceded control to trusted providers citing increased risk, exhaustion, and a lack of expertise. A few women withdrew completely. Some wanted to stay involved in decision-making and were unhappy to be excluded. Authors suggested that "logic of care" was a more appropriate model than choice as it emphasized the fluidity and uncertainty of medical decision-making. |
| 3. Malacrida & Boulton, 2014   | To explore women's expectations and experiences of choices in labor and birth.                               | Alberta, Canada  | Feminist critical, Governmentality                                          | Narrative interviews, analyzed thematically<br>Foci for inquiry and analysis informed by emerging themes      | 22 middle class women who recently gave birth and preferred natural birth<br>Snowball sampling | Disjuncture between expectations of choosing and planning a natural a birth as possible and their experiences of birth. Women made great efforts to achieve a natural birth. Women described getting on a "train" of medical interventions that limited choices. When birth did not go as expected, they tended to blame themselves.                                                                                                                                                     |
| 4. Happel-Parkins & Azim, 2016 | To understand and contextualize the childbirth experiences of first-time mothers planning natural childbirth | Mid-southern USA | Narrative-thematic analysis<br>Feminist critique                            | Semi-structured life-story interviews<br>Analyzed thematically based on Strauss and Corbin's method of coding | 6 women, all middle-class and highly educated, seeking natural childbirth<br>Snowball sampling | Four recurring themes: "Benefits and limitations of pre-labour self-education, laboring women's experiences of relationality, the importance of birth stories and expectations, and the creation of false dilemmas and complexities of "informed choice"". Authors identify false dilemmas in which a provider suggests mutually exclusive options, only one of which is desirable as a method of convincing women to accept intervention. They describe an inability of women           |

|                                       |                                                                                                |               |                                    |                                                                                                |                                                                                                                          |                                                                                                                                                                                                                                                                                                                                                                                                                                                                                                                                                                                                                                                                                                                                                                              |
|---------------------------------------|------------------------------------------------------------------------------------------------|---------------|------------------------------------|------------------------------------------------------------------------------------------------|--------------------------------------------------------------------------------------------------------------------------|------------------------------------------------------------------------------------------------------------------------------------------------------------------------------------------------------------------------------------------------------------------------------------------------------------------------------------------------------------------------------------------------------------------------------------------------------------------------------------------------------------------------------------------------------------------------------------------------------------------------------------------------------------------------------------------------------------------------------------------------------------------------------|
|                                       |                                                                                                |               |                                    |                                                                                                |                                                                                                                          | to overcome medical model in the hospital despite significant education and birth planning.                                                                                                                                                                                                                                                                                                                                                                                                                                                                                                                                                                                                                                                                                  |
| 5. Blix-Lindstrom et al., 2004        | To describe women's experiences with decision-making of labor augmentation                     | Sweden        | Modified grounded theory           | Open-ended interviews 1-3 days after childbirth<br>Analyzed thematically                       | 20 women who received oxytocin augmentation during labor                                                                 | Eight categories were identified:<br>Women's satisfaction with decision-making (core category)<br>Support and guidance from midwives<br>Knowledge about giving birth<br>Expectations about giving birth<br>Information from midwives<br>Confidence in one's own capacity<br>Information from literature and friends<br>'Knowledge and expectations' and 'support and guidance from midwives' related to one another in four different patterns: women who participated in decision-making, women who were invited to participate but refrained, women who did not participate but wanted to, women who did not participate and did not want to. Only the third group was dissatisfied. Women's desire for information exceeded the desire for involvement in decision-making |
| 6. Kjaergaard, Foldgast & Dykes, 2007 | To gain understanding of women's experiences with prolonged or augmented labor and their care. | Sweden        | Grounded theory                    | Open ended interviews.<br>Analyzed thematically                                                | Purposive sample of 10 nulliparous women who experienced prolonged labor and their partners 4-15 weeks after delivery    | The core category was identified as Dialectical Birth Process.<br>Three additional main categories were identified: balancing natural and medical delivery, interacting, losing and regaining control. Finally, acceptance and satisfaction were described as reconciliation after the physical and mental struggles of labor.                                                                                                                                                                                                                                                                                                                                                                                                                                               |
| 7. Nystedt, Hogberg & Lundman, 2006   | To explore the experiences of women with prolonged labor ending in assisted delivery           | Sweden        | Qualitative descriptive            | Thematic interviews 50-75 mins<br>Qualitative content analysis for manifest and latent content | Purposive sample of 10 nulliparous low-risk women with spontaneous, prolonged labor and assisted delivery (Vacuum or CB) | Three categories with six subthemes were identified: being caught in labor', 'being possessed by pain', 'being possessed by fear', 'being out of control', 'being exhausted', 'being powerless', 'being dependent on others', 'being in need of midwifery care', 'being relieved from pain'                                                                                                                                                                                                                                                                                                                                                                                                                                                                                  |
| 8. VandeVusse, 1999                   | To clarify the way that decisions are                                                          | United States | Explorative descriptive, narrative | Re-analysis of birth stories from qualitative                                                  | 15 women with a variety of birth experiences                                                                             | A model of control, method of decision-making and women's emotions was developed with four patterns of control and six corresponding methods of decision-making and related emotions:                                                                                                                                                                                                                                                                                                                                                                                                                                                                                                                                                                                        |

|                         |                                                                                                                                                                |               |                                    |                                                                                                                                                    |                                                                                                                                                                              |                                                                                                                                                                                                                                                                                                                                                                                                                                                                                                                      |
|-------------------------|----------------------------------------------------------------------------------------------------------------------------------------------------------------|---------------|------------------------------------|----------------------------------------------------------------------------------------------------------------------------------------------------|------------------------------------------------------------------------------------------------------------------------------------------------------------------------------|----------------------------------------------------------------------------------------------------------------------------------------------------------------------------------------------------------------------------------------------------------------------------------------------------------------------------------------------------------------------------------------------------------------------------------------------------------------------------------------------------------------------|
|                         | made during labor                                                                                                                                              |               |                                    | study, unstructured interviews<br>Narrative analysis                                                                                               | within 4 months of giving birth                                                                                                                                              | unilateral but contested through refusal or adaptation, unilateral and uncontested through agreement, suspended/waiting through no active decision, shared/joint through explanations or requests.                                                                                                                                                                                                                                                                                                                   |
| 9. Maher, 2008          | To generate a framework to understand women's experience of time during labor                                                                                  | Australia     | Descriptive qualitative            | Semi-structured, in-depth interviews<br>Narrative analysis                                                                                         | 10 women 3-12 months postpartum                                                                                                                                              | Women situate their birth experiences in temporal progress time from a complex combination of direct and overheard communication. Medical terminology was not used in these stories.                                                                                                                                                                                                                                                                                                                                 |
| 10. Meyer, et al., 2017 | To develop a model of decision-making to transfer to the hospital in home and birth center birth in Switzerland by exploring midwives' and women's experiences | Switzerland   | Grounded theory (Strauss & Corbin) | Open-ended interviews recorded and Translated into English. Open, axial and selective coding to identify categories and relationships, commitments | 20 midwives with experiences of considering transfer to the hospital with planned home or birth center birth and 20 women identified by the midwives with similar experience | Central phenomenon: "defining/redefining decision as a joining commitment to healthy childbirth"<br>Sub-indicators: safety, responsibility, mutual and personal commitments.<br>Women's strategies included: "delegating a decision, making the midwife's decision her own, challenging a decision, or taking a decision driven by the dynamics of childbirth"<br>Midwives strategies included: "remaining indecisive, approving a woman's decision, making an informed decision, or taking the necessary decision". |
| 11. Carlton, 2005       | To describe the experience of women who change from preferring unmedicated to medicated childbirth during labor                                                | United States | Descriptive qualitative            | Semi-structured interviews, Thematic analysis                                                                                                      | 33 women who indicated that they preferred unmedicated birth or a wait-and-see approach and later changed their minds in 3 different hospital settings                       | Four primary themes were identified: wanting an unmedicated birth, making a change in pain management, changing birth preferences, reconciling feelings about making that change                                                                                                                                                                                                                                                                                                                                     |
| 12. Dahlen, 2010        | To describe the experiences of first-time mothers giving birth at home and in the hospital                                                                     | Australia     | Descriptive Qualitative            | In-depth interviews analyzed using Grounded theory                                                                                                 | 17 nulliparous women 7 who gave birth at home, 7 at a tertiary hospital, 1 at a private                                                                                      | Three categories emerged: preparing for birth, the novice birthing, processing the birth                                                                                                                                                                                                                                                                                                                                                                                                                             |

|                   |                                                                                     |           |                               |                                                                                                          |                                                                                       |                                                                                                                                                                                                                                                                                                                                                |
|-------------------|-------------------------------------------------------------------------------------|-----------|-------------------------------|----------------------------------------------------------------------------------------------------------|---------------------------------------------------------------------------------------|------------------------------------------------------------------------------------------------------------------------------------------------------------------------------------------------------------------------------------------------------------------------------------------------------------------------------------------------|
|                   |                                                                                     |           |                               |                                                                                                          | hospital, and 2 at a birth center.                                                    |                                                                                                                                                                                                                                                                                                                                                |
| 13. Hauck, 2007   | To explore the influence of expectations on women's perception of birth experience  | Australia | Exploratory descriptive       | In-depth interviews following up initial interviews conducted for an earlier study analyzed thematically | 20 women in the postpartum period, 15 multiparas and 5 primiparas purposively sampled | Data supported themes identified in phase one of the study. Unfulfilled expectations of labor and birth resulted in negative birth experiences. Women with unfulfilled expectations adjusted their expectations for future birth to account more for the unexpected. Support from caring providers mitigated the effect of unmet expectations. |
| 14. O'Brien, 2017 | To explore women's understanding of informed choice during pregnancy and childbirth | Ireland   | Participatory action research | In-depth interviews analyzed using the voice-centered relational method.                                 | 15 women in the postpartum period who gave birth in hospital                          | Five themes emerged: making the right choices for the baby, choice is contingent on having the right information, informed choice is defined by expectations, informed choice is defined by the self, informed choice is defined by relationships                                                                                              |
