# Supplementary material
Source: PubMed Central journal article supplement (PMC7018597)
Supplement: NIHMS1537773-supplement-3.pdf [file NIHMS1537773-supplement-3.pdf]

Table 2. Reciprocal Translation Table

| Derived Categories and Subthemes                                                         | Study Numbers*                                                                   | In Vivo Themes (as labeled in included studies)                                                                                                                                                                                                                      |
|------------------------------------------------------------------------------------------|----------------------------------------------------------------------------------|----------------------------------------------------------------------------------------------------------------------------------------------------------------------------------------------------------------------------------------------------------------------|
| <b>Transition from anticipated natural birth to medical delivery was:</b>                |                                                                                  |                                                                                                                                                                                                                                                                      |
| superimposed on the transition to motherhood                                             | 1 (pg. 136), 3 (pg. 13), 7 (pg. 64), 12 (pg. 420)                                | Actions and reactions of midwives; Questions and blame: Reconciling birth expectations with experience, Novice birthing: reacting to the unknown                                                                                                                     |
| characterized by entering the sick role and experienced as suffering                     | 2 (pg. 231), 7 (pg. 60, 63)                                                      | Coping with diminishing choice; Being caught up in labor; Being possessed by fear and pain                                                                                                                                                                           |
| complicated by the necessity to transfer care location or provider                       | 1 (pg. 135), 2 (pg. 229-230), 10 (pg. e274)                                      | Actions and reactions of midwives; Choices had been made, but had to be revisited                                                                                                                                                                                    |
| <b>Expectations for labor and birth were:</b>                                            |                                                                                  |                                                                                                                                                                                                                                                                      |
| developed through knowledge, preparation, and birth planning                             | 2 (pg. 229-230), 3 (pg. 8), 4 (pg. 5), 5 (pg. 107), 12 (pg. 417-419), 14 (pg. 3) | Choices had been made but had to be revisited; Efforts to maximize natural 'chances'; The benefits and limitations of pre-labour self-education; Knowledge and expectations about giving birth; responsibility; choice is contingent on having the right information |
| framed by stories from family, friends, and the media                                    | 4 (pg. 6-7), 5 (pg. 107)                                                         | The importance of stories and expectations; Information from literature and friends                                                                                                                                                                                  |
| inclusive of fear of pain and the unknown                                                | 12 (pg. 419)                                                                     | Expectations                                                                                                                                                                                                                                                         |
| based on inadequate knowledge, for some women                                            | 1 (pg. 135), 4 (pg. 5-6), 14 (pg. 4)                                             | Insufficient and inadequate information; Pre-labour self-education: privileged, agentic, and inadequate; informed choice is defined by expectations                                                                                                                  |
| almost never realized, especially by first time mothers                                  | 12 (pg. 422), 13 (pg. 239)                                                       | positive birth experience: expectations achieved                                                                                                                                                                                                                     |
| <b>Awareness of the transition was:</b>                                                  |                                                                                  |                                                                                                                                                                                                                                                                      |
| experienced through symptoms of fear, pain, and fatigue                                  | 2 (pg. 230), 6 (pg. 4), 7 (pg. 60), 13 (pg. 240)                                 | There came a point at which choice receded; Being possessed by fear and pain; birth is painful, long and hard                                                                                                                                                        |
| described as the body not co-operating with the desire of the mind for labor to progress | 2 (pg. 230), 6 (pg. 4, 7)                                                        | There came a point at which choice receded; Balancing natural birth and medical birth                                                                                                                                                                                |
| realized through cervical dilation over time as an objective measure                     | 2 (pg. 230), 9 (pg. 134-135), 10 (pg. e275)                                      | There came a point at which choice receded; Signs of progress; Safety commitment                                                                                                                                                                                     |

|                                                                                                         |                                                                                                     |                                                                                                                                                                                                                                                                            |
|---------------------------------------------------------------------------------------------------------|-----------------------------------------------------------------------------------------------------|----------------------------------------------------------------------------------------------------------------------------------------------------------------------------------------------------------------------------------------------------------------------------|
| gathered through overhearing providers or indirect communication                                        | 2 (pg. 230), 9 (pg. 134-136)                                                                        | There came a point at which choice receded; Signs of progress, Mistimed communications                                                                                                                                                                                     |
| experienced in relationship to the anticipated time of labor                                            | 9 (pg. 133-134)                                                                                     | Time, communication and experience                                                                                                                                                                                                                                         |
| <b>Loss of choice in labor was experienced as:</b>                                                      |                                                                                                     |                                                                                                                                                                                                                                                                            |
| a change from focusing on natural birth to accepting medical delivery                                   | 2 (pg. 231), 6 (pg. 4, 7), 7 (pg. 61), 11 (pg. 148)                                                 | Coping with diminishing choice, there came a point at which choice receded; dialectical birth process; balancing natural and medical delivery; being exhausted; wanting an unmedicated birth, making a change in pain management, changing birth preference                |
| being caught up in the physical experience of labor                                                     | 6 (pg. 6), 11 (pg. 148)                                                                             | Being caught up in labor, being possessed by pain; making a change in pain management                                                                                                                                                                                      |
| a perceived lack of choices related to increases in risk, especially a threat to the health of the baby | 1 (pg. 136), 2 (pg. 226, 231, 233), 3 (pg. 12), 4 (pg. 7), 10 (e274-e275), 13 (pg. 240), 14 (pg. 3) | Actions and reactions of midwives; Coping with diminishing choice; 'On a train': medical interventions and choice; birth is a healthy baby; safety commitment, responsible commitment; making the right choices for the baby                                               |
| being excluded from the process of decision making                                                      | 1 (pg. 135), 2 (pg. 231, 233), 3 (pg. 8, 11), 5 (pg. 108), 14 (pg. 5)                               | Actions and reactions of midwives; Coping with diminishing choice; 'On a train': medical interventions and choice; Participated in decision making; informed choice is defined 'by the self'                                                                               |
| dependency on trusted care providers                                                                    | 2 (pg. 231), 3 (pg. 13), 5 (pg. 108), 7 (pg. 61), 10 (pg. 276)                                      | Coping with diminishing choice; Questions and blame: reconciling birth expectations with experience; Participated in decision making; Mutual commitment                                                                                                                    |
| a questioning of the fundamental concept of choice in labor                                             | 2 (pg. 231), (4, pg. 7), 3 (pg. 10, 15), 13 (pg. 245)                                               | Efforts to maximize 'Natural choices', 'On a train': medical interventions and choice; Being dependent on others, Being in need of midwifery care                                                                                                                          |
| <b>Indicators of positive coping with process of the transition included:</b>                           |                                                                                                     |                                                                                                                                                                                                                                                                            |
| feeling connected to one's support                                                                      | 4 (pg. 6), 6 (pg. 6), 9, 10 (pg. e276)                                                              | Labouring women's experiences of relationality; time, communication, and experience; interacting; mutual commitment                                                                                                                                                        |
| feeling safe and valued in positive interactions of caring by providers                                 | 1 (pg. 134-135), 6 (pg. 6), 7 (pg. 61), 13 (pg. 244), 14 (pg. 6)                                    | Feeling safe, feeling valued, and being available; mutual commitment; the midwife approves of the woman's decision; being dependent on others; being in need of midwifery care; interacting; informed choice is relational; the importance of the woman-carer relationship |
| accepting necessity of medical intervention and feeling relieved by treatment                           | 2 (pg. 234), 6 (pg. 4, 6), 7 (pg. 62), 8 (pg. 48), 9                                                | being in need of midwifery care; being relieved from pain; signs of progress; coping with diminishing choice; balancing natural birth and medical birth                                                                                                                    |

|                                                                                                                                                                               |                                                      |                                                                                                                                                                            |
|-------------------------------------------------------------------------------------------------------------------------------------------------------------------------------|------------------------------------------------------|----------------------------------------------------------------------------------------------------------------------------------------------------------------------------|
| variety in the way women wanted to engage in decision making                                                                                                                  | 5, (pg. 107-109), 6, 8 (pg45-48), 10 (pg. e276-e277) | Personal commitment, Indicators' influence on shared decision making                                                                                                       |
| relief related to giving birth to a healthy baby                                                                                                                              | 3 (pg. 13-14), 5 (pg. 109), 11 (pg. 148)             | Questions and blame: reconciling birth expectations with experience; Reconciling feelings about making that change                                                         |
| high levels of satisfaction with the experience                                                                                                                               | 3 (pg. 14), 5 (pg. 107-109), 8 (pg. 48)              | level of satisfaction; women's expressed emotions; time, communication, and experience; questions and blame: reconciling birth expectations with experience                |
| Support in reconciling expectations and experience                                                                                                                            | 3 (pg. 13-14), 6 (pg. 5); 12 (pg. 422)               | Questions and blame: reconciling birth expectations with experience; Acceptance, satisfaction and reconciliation; Reconciling feelings about making that change            |
| <b>Indicators of negative coping with the process of transition included:</b>                                                                                                 |                                                      |                                                                                                                                                                            |
| dissatisfaction and difficulty reconciling due to negative interactions with care providers, especially feeling excluded from decision making when they wanted to participate | 1 (pg. 135), 3 (pg. 13-15), 4 (pg. 6), 7 (pg. 61), 9 | actions and reactions of midwives; the midwife remains indecisive; mistimed communication; Being in need of midwifery care; labouring women's experiences of relationality |
| self-blame for the outcome                                                                                                                                                    | 3 (pg. 13-15)                                        | Questions and blame: reconciling birth expectations and experience                                                                                                         |
| low levels of satisfaction with the experience                                                                                                                                | 3 (pg. 14), 5 (107-109), 8 (pg. 48)                  | level of satisfaction; women's expressed emotions; time, communication, and experience; questions and blame: reconciling birth expectations with experience                |
| Some women experienced trauma                                                                                                                                                 | 2 (pg. 232), 4 (pg. 6), 7 (pg. 60-61), 12 (pg. 420)  | Coping with diminished choice; Pre-labour self-education: privileged, agentic, and inadequate; Being possessed by fear                                                     |

\*Study numbers correspond to table
